# Supplementary material for: Assessing boundary condition and parametric uncertainty in numerical-weather-prediction-modeled, long-term offshore wind speed through machine learning and analog ensemble
Source: Copernicus journal article supplement (doi:10.5194/wes-6-1363-2021), 2021-11-03
Supplement: Supplementary file 1 [file wes-6-1363-2021-supplement.pdf]

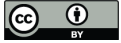

*Supplement of*

**Assessing boundary condition and parametric uncertainty in numerical-weather-prediction-modeled, long-term offshore wind speed through machine learning and analog ensemble**

**Nicola Bodini et al.**

*Correspondence to:* Nicola Bodini ([nicola.bodini@nrel.gov](mailto:nicola.bodini@nrel.gov))

The copyright of individual parts of the supplement might differ from the article licence.

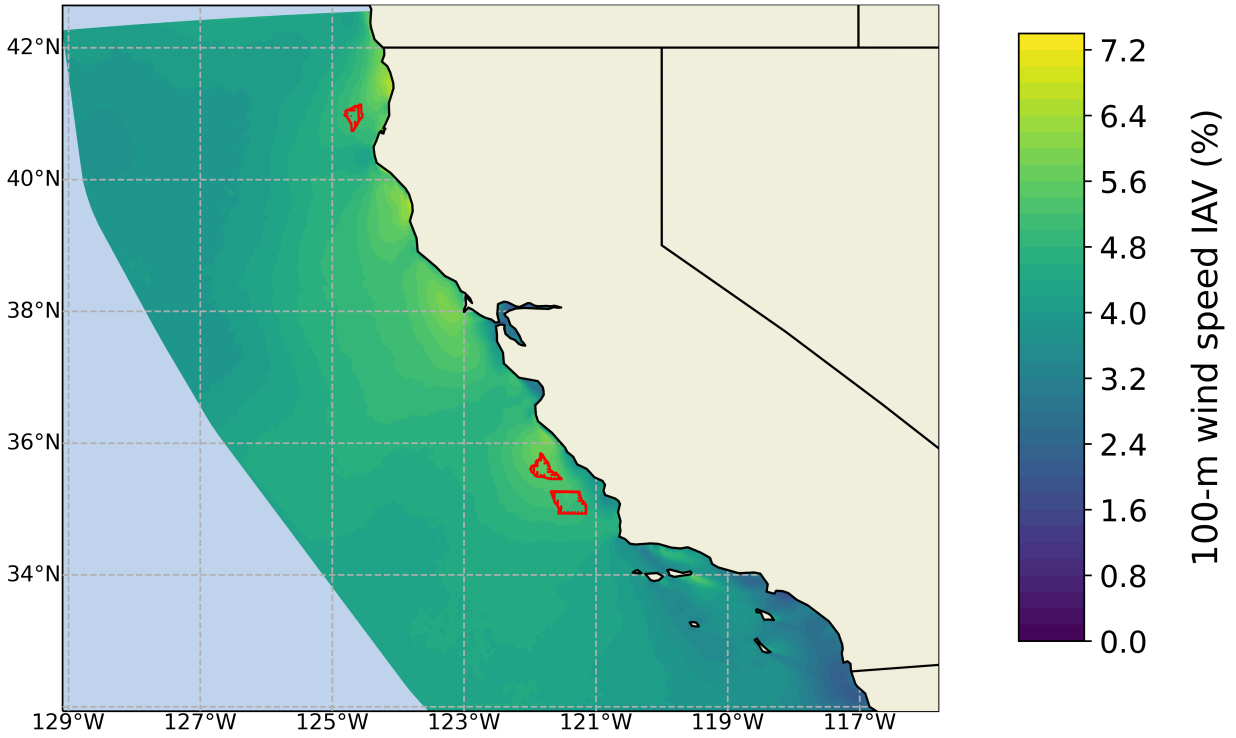

Figure S1: Interannual variability in 100-m wind speed calculated using the WRF 20-year data.
